# Supplementary material for: In Pursuit of Optimal Quality: Cultivar-Specific Drying Approaches for Medicinal Cannabis
Source: MDPI journal article supplement (doi:10.3390/plants13071049), 2024-04-08
Supplement: s1 [file s1]

**Table S1.** Analytical parameters of cannabinoids analyzed by HPLC-PDA.

| Name <sup>a</sup>   | RT <sup>a</sup><br>(min) | $R^2$ <sup>b</sup> | LOQ <sup>c</sup><br>( $\mu$ g/mL<br>solvent) | LOD <sup>d</sup><br>( $\mu$ g/mL<br>solvent) | Concentration<br>range<br>( $\mu$ g/mL<br>solvent) | Accuracy<br>(%) | Repeatability<br>(%CV within<br>day) | Repeatability<br>(%CV<br>between<br>days) |
|---------------------|--------------------------|--------------------|----------------------------------------------|----------------------------------------------|----------------------------------------------------|-----------------|--------------------------------------|-------------------------------------------|
| CBDVA               | 2.5                      | 0.999              | 0.70                                         | 0.21                                         | 1-50                                               | 3%              | 1.7%                                 | 0.8%                                      |
| CBDA                | 3.6                      | 0.999              | 1.21                                         | 0.36                                         | 1-1000                                             | 3%              | 0.7%                                 | 0.1%                                      |
| CBGA                | 3.9                      | 0.999              | 1.55                                         | 0.46                                         | 1-100                                              | 2%              | 0.6%                                 | 0.2%                                      |
| CBG                 | 4.1                      | 0.999              | 2.57                                         | 0.77                                         | 1-100                                              | 2%              | 0.5%                                 | 0.2%                                      |
| CBD                 | 4.4                      | 0.999              | 2.68                                         | 0.80                                         | 1-500                                              | 10%             | 0.6%                                 | 0.08%                                     |
| THCVA               | 5.6                      | 0.999              | 1.15                                         | 0.34                                         | 1-50                                               | 2%              | 2.2%                                 | 0.9%                                      |
| CBN                 | 6.4                      | 0.997              | 1.43                                         | 0.43                                         | 1-100                                              | 5%              | 0.6%                                 | 0.04%                                     |
| $\Delta$ -9-<br>THC | 8.2                      | 0.996              | 3.69                                         | 1.11                                         | 1-500                                              | 8%              | 1.4%                                 | 1.9%                                      |
| $\Delta$ -8-<br>THC | 8.5                      | 0.999              | 3.12                                         | 1.05                                         | 1-100                                              | 10%             | 0.8%                                 | 0.2%                                      |
| THCA                | 10.7                     | 0.999              | 2.52                                         | 0.76                                         | 1-1000                                             | 4%              | 0.5%                                 | 0.4%                                      |
| CBCA                | 12.4                     | 0.996              | 9.50                                         | 3.15                                         | 5-100                                              | 5%              | 0.8%                                 | 0.2%                                      |

<sup>a</sup>RT, retention time in minutes. <sup>b</sup> $R^2$ , coefficient of determination. <sup>c</sup>LOQ, limit of quantitation. <sup>d</sup>LOD, limit of detection. \*CBDVA, cannabidivarinic acid. CBDA, cannabidiolic acid. CBGA, cannabigerolic acid. CBG, cannabigerol. CBD, cannabidiol. THCVA, (-)- $\Delta$ 9-trans-tetrahydrocannabivarinic acid. CBN, cannabinol.  $\Delta$ -9-THC, (-)- $\Delta$ 9-trans-tetrahydrocannabinol.  $\Delta$ -8-THC, (-)- $\Delta$ 8-trans-tetrahydrocannabinol. THCA, (-)- $\Delta$ 9-trans-tetrahydrocannabinolic acid. CBCA, cannabichromenic acid.

**Table S2.** Analytical parameters of terpenes analyzed by GC/MS.

| Name                     | RT <sup>a</sup><br>[min] | R <sup>2b</sup> | LOQ <sup>c</sup><br>( $\mu$ g/mL<br>solvent) | LOD <sup>d</sup><br>( $\mu$ g/mL<br>solvent) | Concentration<br>range<br>( $\mu$ g/ml solvent) |
|--------------------------|--------------------------|-----------------|----------------------------------------------|----------------------------------------------|-------------------------------------------------|
| $\alpha$ -pinene         | 8.2                      | 0.9993          | 7.57                                         | 0.53                                         | 0.5-250                                         |
| camphene                 | 9.2                      | 0.9995          | 6.36                                         | 0.48                                         | 0.5-250                                         |
| $\beta$ -pinene          | 10.6                     | 0.9992          | 8.39                                         | 1.91                                         | 0.5-250                                         |
| $\beta$ -myrcene         | 11.5                     | 0.9996          | 5.45                                         | 0.96                                         | 0.5-250                                         |
| $\delta$ -3-carene       | 12.9                     | 0.9999          | 1.46                                         | 0.77                                         | 0.5-250                                         |
| $\alpha$ -terpinene      | 13.4                     | 0.9994          | 7.08                                         | 2.2                                          | 0.5-250                                         |
| p-cymene                 | 13.8                     | 0.9994          | 7.23                                         | 0.90                                         | 0.5-250                                         |
| d-limonene               | 14.0                     | 0.9995          | 6.11                                         | 0.44                                         | 0.5-250                                         |
| ocimene                  | 15.3                     | 0.9996          | 5.98                                         | 3.77                                         | 0.5-250                                         |
| $\gamma$ -terpinene      | 16.4                     | 0.9996          | 5.30                                         | 0.99                                         | 0.5-250                                         |
| terpinolene              | 18.0                     | 0.9995          | 6.25                                         | 0.31                                         | 0.5-250                                         |
| linalool                 | 19.6                     | 0.9997          | 4.65                                         | 2.67                                         | 0.5-250                                         |
| (-)-isopulegol           | 23.1                     | 0.9996          | 5.32                                         | 3.30                                         | 0.5-250                                         |
| geraniol                 | 30.8                     | 0.9988          | 20.35                                        | 11.12                                        | 0.5-250                                         |
| $\beta$ -caryophyllene   | 38.9                     | 0.9997          | 4.91                                         | 0.84                                         | 0.5-250                                         |
| $\alpha$ -humulene       | 40.6                     | 0.9996          | 5.33                                         | 0.94                                         | 0.5-250                                         |
| nerolidol                | 46.9                     | 0.9957          | 22.70                                        | 13.19                                        | 0.5-250                                         |
| (-)-guaiaol              | 48.7                     | 0.9996          | 5.72                                         | 4.04                                         | 0.5-250                                         |
| (-)- $\alpha$ -bisabolol | 54.1                     | 0.9989          | 9.58                                         | 4.75                                         | 0.5-250                                         |

<sup>a</sup>RT, retention time in minutes. <sup>b</sup>R<sup>2</sup>, coefficient of determination. <sup>c</sup>LOQ, limit of quantitation. <sup>d</sup>LOD, limit of detection.
